# Supplementary material
Source: MDPI journal article supplement (https://www.mdpi.com/2073-445X/7/4/152)
Supplement: s1 [file s1]

# Assessment of land cover changes in the hinterland of Barranquilla (Colombia) using Landsat imagery and logistic regression

Henry Schubert\*, Andrés Caballero Calvo, Markus Rauchecker, Oscar Rojas-Zamora, Grischa Brokamp and Brigitta Schütt

\* Correspondence: h.schubert@fu-berlin.de; Tel.: +49-30-838-70519

## Supplementary Note 1 - Vegetation cover changes

Maps of vegetation cover change for the periods 1985-1990, 1990-2001, 2001-2010 and 2010-2017 with the four transition classes: *stable vegetated*, *woody vegetation loss*, *stable unvegetated*, and *woody vegetation gain* (see Section 3.3).

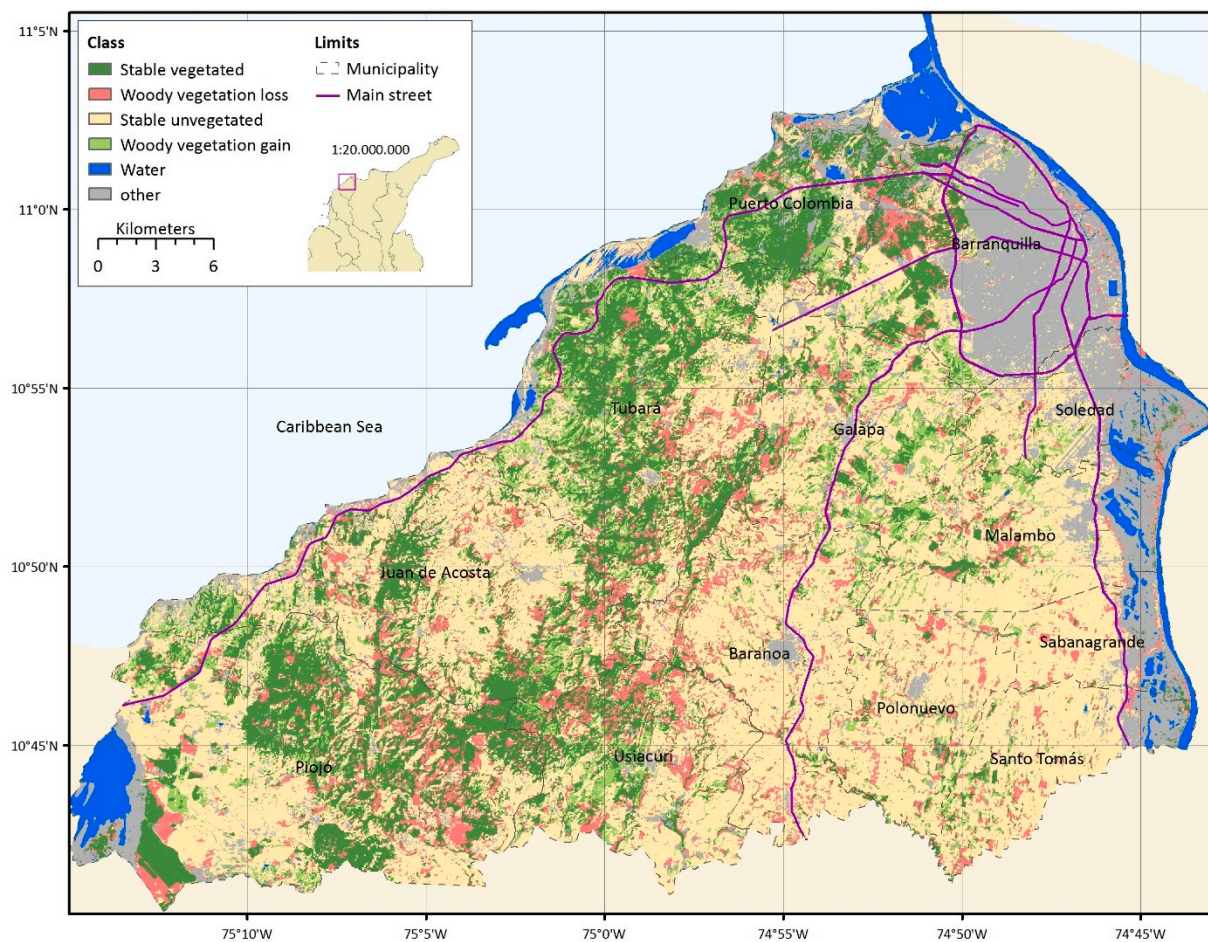

Figure S1. Vegetation cover changes in the hinterland of Barranquilla between 1985 and 1990.

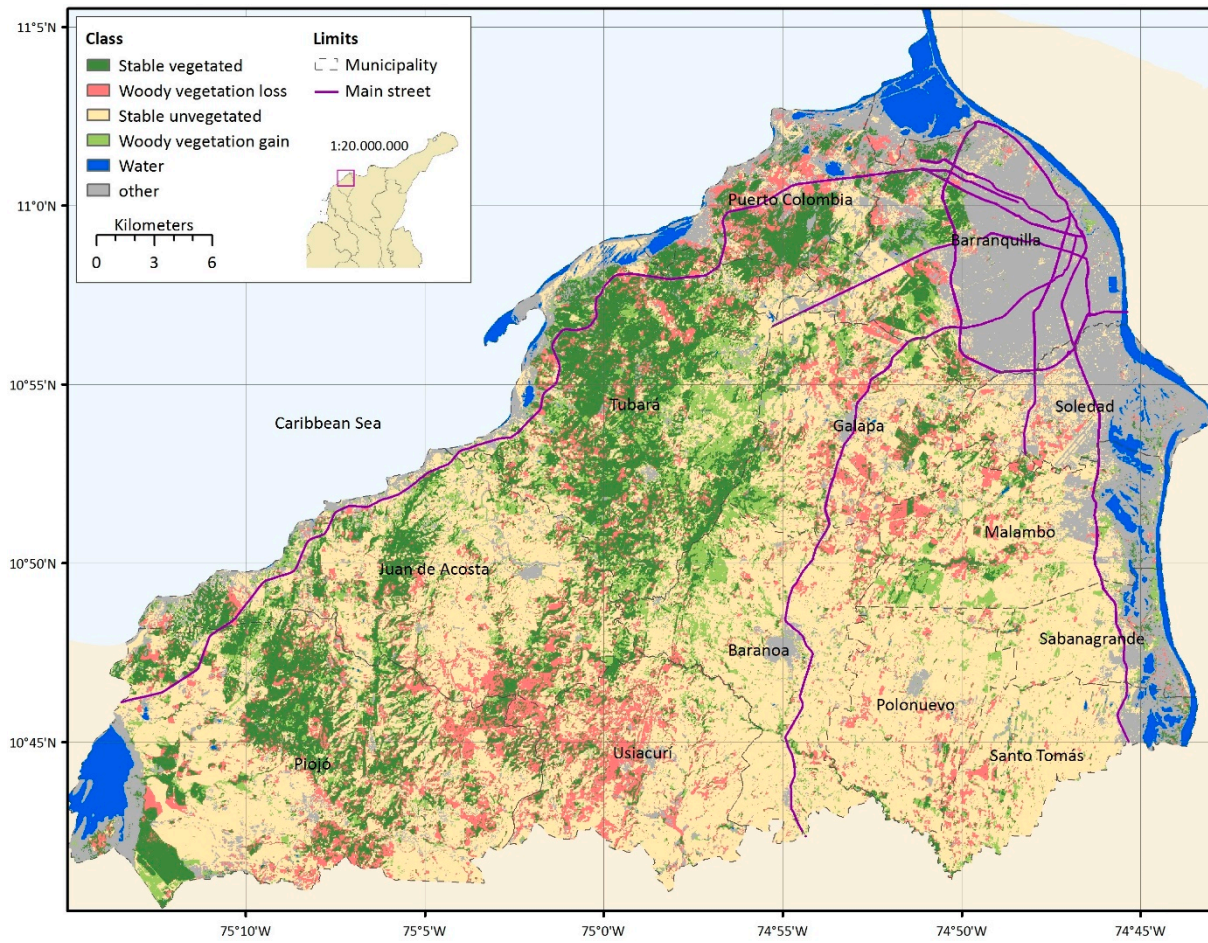

**Figure S2.** Vegetation cover changes in the hinterland of Barranquilla between 1990 and 2001.

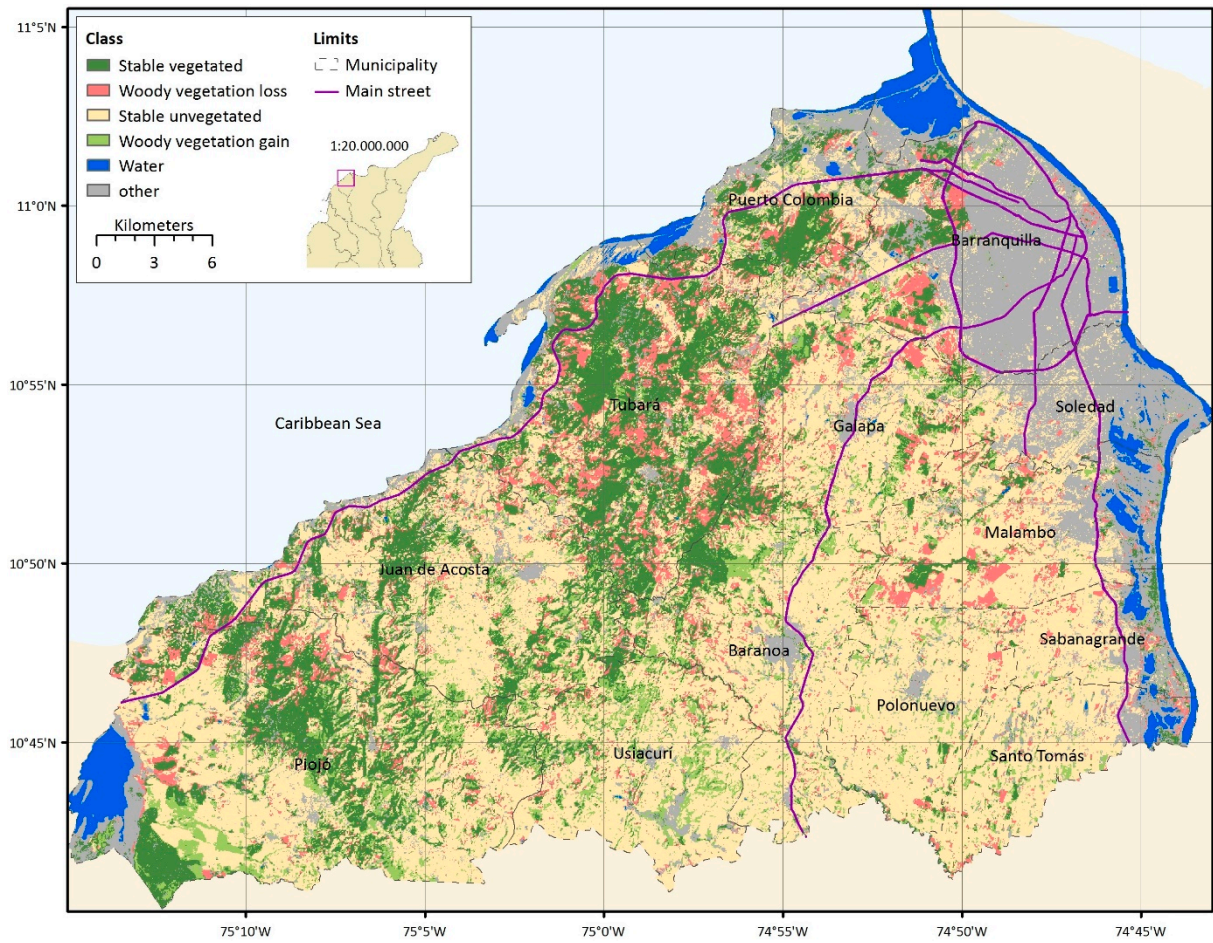

**Figure S3.** Vegetation cover changes in the hinterland of Barranquilla between 2001 and 2010.

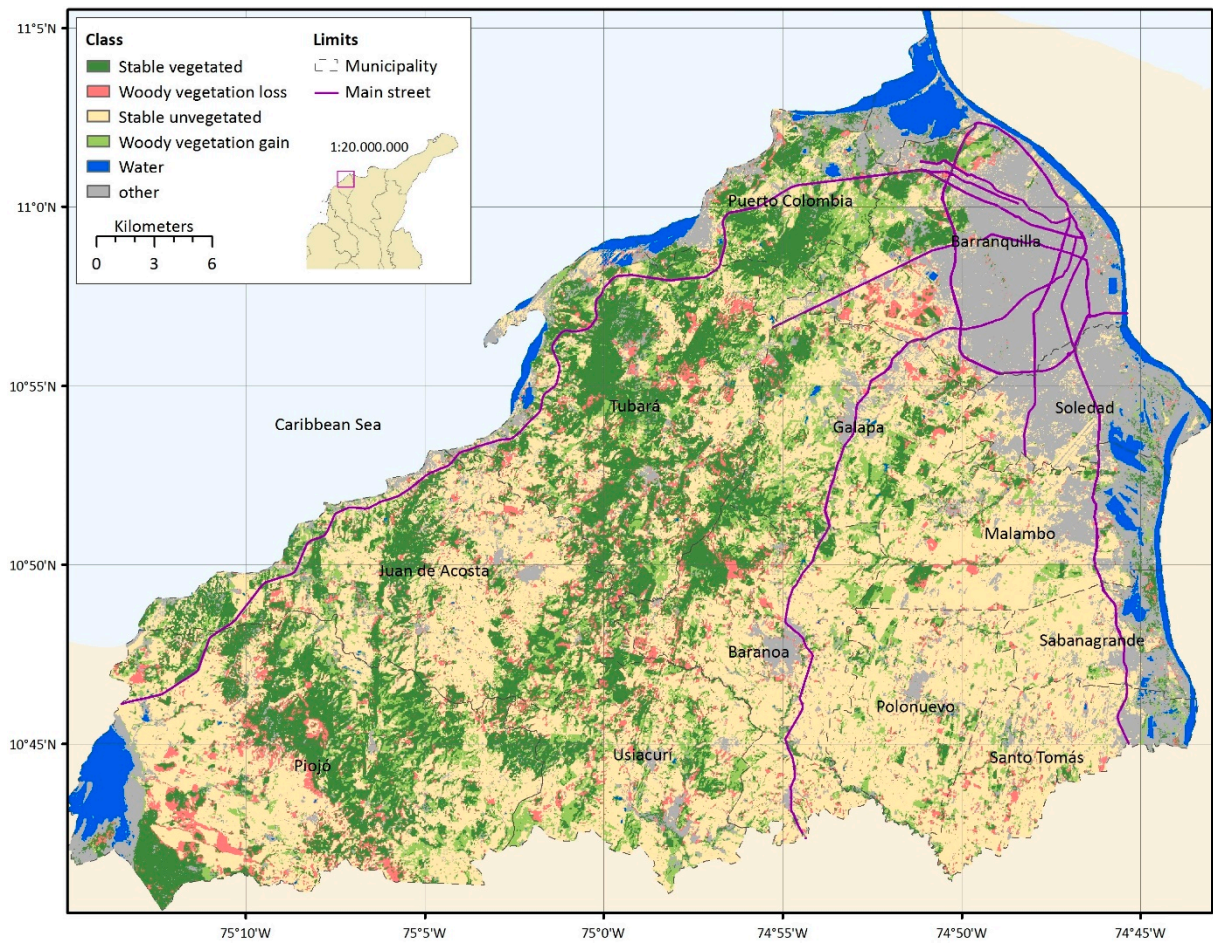

**Figure S4.** Vegetation cover changes in the hinterland of Barranquilla between 2010 and 2017.
